# Supplementary material for: Association Between Idiopathic Intracranial Hypertension and Risk of Cardiovascular Diseases in Women in the United Kingdom
Source: PubMed Central journal article supplement (PMC6618853; doi:10.1001/jamaneurol.2019.1812), 2019-07-08
Supplement: jamaneurol-76-1088-s001.pdf [file jamaneurol-76-1088-s001.pdf]

## Supplementary Online Content

Adderley NJ, Subramanian A, Nirantharakumar K, et al. Association between idiopathic intracranial hypertension and risk of cardiovascular diseases in women in the United Kingdom. *JAMA Neurol*. Published online July 8, 2019.  
doi:10.1001/jamaneurol.2019.1812

**eAppendix 1.** Methods

**eAppendix 2.** Muscle Mass

**eFigure.** Muscle Mass in Patients With IIH and BMI-Matched Controls Without IIH

**eTable 1.** Prevalence and Incidence of IIH Among Females in the UK From 2005 to 2017

**eTable 2.** Incidence of IIH Among Females From 2005 to 2015 Stratified By Age At Diagnosis, BMI and Townsend Score

**eTable 3.** Sensitivity Analyses

This supplementary material has been provided by the authors to give readers additional information about their work.

## **eAppendix 1. Methods**

### ***Shunt procedures***

In exploratory analysis, we found that 6.5% (n = 174) of IHH patients in the CVD risk cohort had a record of shunt surgery. Among IHH patients who did and did not develop CVD, 7.4% (n = 5) and 6.5% (n = 169) respectively had had a shunt procedure; this difference was not statistically significant:  $p=0.77$  (Chi<sup>2</sup> test).

## **eAppendix 2. Muscle Mass**

Previously published research by the study team has documented a similar adipose distribution in patients with IIH compared to a BMI-matched control group without IIH.<sup>1</sup> In the same study cohort, using the published methodology, dual-energy X-ray absorptiometry data was also generated to quantify muscle mass. This previously unpublished data found no difference in muscle mass between IIH patients and controls matched for sex, age and BMI ( $53.9 \pm 3.7$  kg in IIH versus  $54.6 \pm 4.3$  kg in controls,  $p=0.6$ ) (see eFigure 1 below). The preserved muscle mass points away from inactivity.

---

<sup>1</sup> Hornby C, Botfield H, O'Reilly MW, et al. Evaluating the Fat Distribution in Idiopathic Intracranial Hypertension Using Dual-Energy X-ray Absorptiometry Scanning. *Neuro-Ophthalmology* 2018;42:99-104. doi: 10.1080/01658107.2017.1334218

**eFigure.** Muscle Mass in Patients With IIH and BMI-Matched Controls Without IIH (previously unpublished)

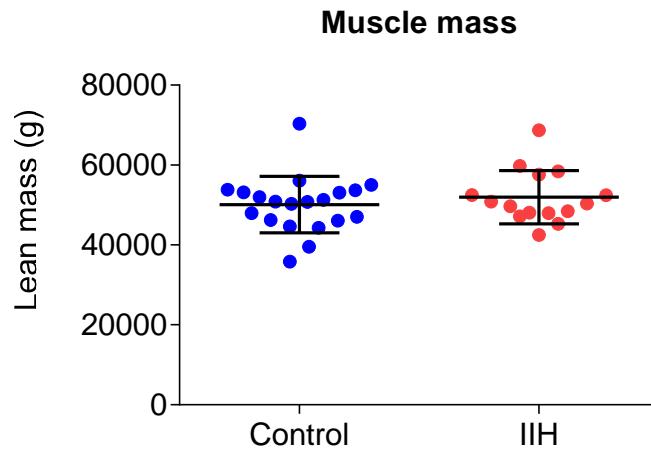

|     | Control   | IIH       | P    |
|-----|-----------|-----------|------|
| Age | 42.2(4.3) | 39.5(6.1) | 0.13 |
| BMI | 34.6(3.6) | 37.6(6.3) | 0.11 |
| N   | 20        | 15        |      |

**eTable 1.** Prevalence and Incidence of IHH among Females in the UK From 2005 to 2017

| Year | Prevalence      |                  |                               | Incidence      |              |                                |
|------|-----------------|------------------|-------------------------------|----------------|--------------|--------------------------------|
|      | Prevalent cases | Total population | Prevalence/100,000 population | Incident cases | Person-years | Incidence/100,000 person-years |
| 2005 | 520             | 1,986,837        | 26.2                          | 52             | 2,082,897    | 2.5                            |
| 2006 | 616             | 2,183,651        | 28.2                          | 67             | 2,205,700    | 3.0                            |
| 2007 | 712             | 2,279,040        | 31.2                          | 63             | 2,297,936    | 2.7                            |
| 2008 | 786             | 2,367,668        | 33.2                          | 81             | 2,428,556    | 3.3                            |
| 2009 | 936             | 2,533,986        | 36.9                          | 94             | 2,543,310    | 3.7                            |
| 2010 | 1036            | 2,566,281        | 40.4                          | 101            | 2,534,461    | 4.0                            |
| 2011 | 1135            | 2,563,189        | 44.3                          | 106            | 2,569,245    | 4.1                            |
| 2012 | 1249            | 2,618,017        | 47.7                          | 120            | 2,654,705    | 4.5                            |
| 2013 | 1382            | 2,673,994        | 51.7                          | 150            | 2,598,355    | 5.8                            |
| 2014 | 1417            | 2,523,090        | 56.2                          | 166            | 2,447,783    | 6.8                            |
| 2015 | 1504            | 2,356,044        | 63.8                          | 153            | 2,165,057    | 7.1                            |
| 2016 | 1394            | 1,967,841        | 70.8                          | 172            | 1,856,500    | 9.3                            |
| 2017 | 1397            | 1,768,422        | 79.0                          | 152            | 1,642,800    | 9.3                            |

**eTable 2.** Incidence of IIH Among Females From 2005 to 2017 Stratified By Age At Diagnosis, BMI and Townsend Score

|                                      | <b>Crude Incidence rate ratio<br/>(95% CI, p-value)</b> | <b>Adjusted Incidence rate<br/>ratio* (95% CI, p-value)</b> |
|--------------------------------------|---------------------------------------------------------|-------------------------------------------------------------|
| <b>BMI category</b>                  |                                                         |                                                             |
| < 25 kg/m <sup>2</sup>               | Reference                                               | Reference                                                   |
| 25-30 kg/m <sup>2</sup>              | 2.47 (1.96-3.11, p<0.001)                               | 3.76 (2.98-4.74, p<0.001)                                   |
| > 30 kg/m <sup>2</sup>               | 11.11 (9.14-13.51, p<0.001)                             | 17.55 (14.41-21.36, p<0.001)                                |
| <b>Townsend deprivation quintile</b> |                                                         |                                                             |
| 1 (least deprived)                   | Reference                                               | Reference                                                   |
| 2                                    | 1.00 (0.81-1.22, p=0.966)                               | 0.92 (0.75-1.12, p=0.407)                                   |
| 3                                    | 1.60 (1.34-1.92, p<0.001)                               | 1.25 (1.04-1.49, p=0.017)                                   |
| 4                                    | 1.68 (1.40-2.02, p<0.001)                               | 1.15 (0.96-1.38, p=0.141)                                   |
| 5 (most deprived)                    | 2.41 (2.00-2.89, p<0.001)                               | 1.47 (1.22-1.77, p<0.001)                                   |
| <b>Age at diagnosis</b>              |                                                         |                                                             |
| 0-12                                 | Reference                                               | Reference                                                   |
| 13-19                                | 7.50 (5.49-10.25, p<0.001)                              | 8.34 (6.09-11.42, p<0.001)                                  |
| 20-29                                | 14.27 (10.70-19.03, p<0.001)                            | 14.83 (10.99-20.02, p<0.001)                                |
| 30-39                                | 7.28 (5.41-9.79, p<0.001)                               | 6.47 (4.74-8.84, p<0.001)                                   |
| 40-49                                | 3.22 (2.35-4.42, p<0.001)                               | 2.51 (1.80-3.50, p<0.001)                                   |
| 50-59                                | 1.58 (1.10-2.27, p=0.014)                               | 1.14 (0.79-1.67, p=0.481)                                   |
| 60-69                                | 0.60 (0.37-0.98, p=0.043)                               | 0.43 (0.26-0.71, p=0.001)                                   |
| 70 and above                         | 0.27 (0.15-0.51, p<0.001)                               | 0.22 (0.12-0.42, p<0.001)                                   |

\*Model adjusted for age category at diagnosis, BMI category and Townsend deprivation quintile. BMI: body mass index.

**eTable 3.** Sensitivity Analyses

|                                              | <b>Sensitivity Analysis 1:<br/>Incident cohort only</b> |                  | <b>Sensitivity Analysis 2:<br/>Cohort aged below 60</b> |                  |
|----------------------------------------------|---------------------------------------------------------|------------------|---------------------------------------------------------|------------------|
|                                              | <b>Exposed</b>                                          | <b>Unexposed</b> | <b>Exposed</b>                                          | <b>Unexposed</b> |
| <b>Composite CVD</b>                         |                                                         |                  |                                                         |                  |
| Population, n                                | 1275                                                    | 12421            | 2587                                                    | 25209            |
| Outcome events, n (%)                        | 30 (2.30)                                               | 98 (0.78)        | 63 (2.38)                                               | 274 (1.08)       |
| Person-years                                 | 5,570                                                   | 52,371           | 12,689                                                  | 125,849          |
| Crude incidence rate (per 1000 person-years) | 5.39                                                    | 1.87             | 4.97                                                    | 2.18             |
| Follow-up years, median (IQR)                | 3.10 (1.28-6.21)                                        | 3.07 (1.30-6.03) | 3.51 (1.34-7.11)                                        | 3.69 (1.50-7.34) |
| Crude HR (95% CI), p-value                   | 2.85 (1.89-4.29);<br>p<0.001                            |                  | 2.26 (1.72-2.97);<br>p<0.001                            |                  |
| Adjusted HR (95% CI), p-value (Model 2a)     | 3.14 (2.07-4.78);<br>p<0.001                            |                  | 2.09 (1.58-2.75);<br>p<0.001                            |                  |
| <b>Heart failure</b>                         |                                                         |                  |                                                         |                  |
| Population, n                                | 1322                                                    | 12634            | 2689                                                    | 25704            |
| Outcome events, n (%)                        | 6 (0.45)                                                | 24 (0.19)        | 13 (0.48)                                               | 65 (0.25)        |
| Person-years                                 | 5,726                                                   | 53,249           | 13,220                                                  | 128,627          |
| Crude incidence rate (per 1000 person-years) | 1.05                                                    | 0.45             | 0.98                                                    | 0.51             |
| Follow-up years, median (IQR)                | 3.13 (1.30-6.28)                                        | 3.09 (1.31-6.08) | 3.58 (1.38-7.27)                                        | 3.73 (1.51-7.42) |
| Crude HR (95% CI), p-value                   | 2.30 (0.94-5.62);<br>p=0.069                            |                  | 1.90 (1.05-3.44);<br>p=0.035                            |                  |
| Adjusted HR (95% CI), p-value (Model 2a)     | 2.69 (1.07-6.79);<br>p=0.036                            |                  | 1.70 (0.93-3.11);<br>p=0.087                            |                  |
| <b>Ischaemic heart disease</b>               |                                                         |                  |                                                         |                  |
| Population, n                                | 1310                                                    | 12563            | 2659                                                    | 25516            |
| Outcome events, n (%)                        | 10 (0.76)                                               | 36 (0.29)        | 25 (0.93)                                               | 119 (0.46)       |
| Person-years                                 | 5,693                                                   | 52,826           | 13,041                                                  | 127,131          |
| Crude incidence rate (per 1000 person-years) | 1.76                                                    | 0.68             | 1.92                                                    | 0.94             |
| Follow-up years, median (IQR)                | 3.14 (1.30-6.28)                                        | 3.08 (1.30-6.06) | 3.57 (1.37-7.21)                                        | 3.70 (1.51-7.38) |
| Crude HR (95% CI), p-value                   | 2.57 (1.27-5.17);<br>p=0.008                            |                  | 2.03 (1.32-3.13);<br>p=0.001                            |                  |
| Adjusted HR (95% CI), p-value (Model 2a)     | 2.81 (1.37-5.75);<br>p=0.005                            |                  | 1.78 (1.15-2.76);<br>p=0.009                            |                  |
| <b>Stroke/TIA</b>                            |                                                         |                  |                                                         |                  |
| Population, n                                | 1298                                                    | 12545            | 2637                                                    | 25527            |

|                                              |                              |                  |                              |                  |
|----------------------------------------------|------------------------------|------------------|------------------------------|------------------|
| Outcome events, n (%)                        | 16 (1.22)                    | 53 (0.42)        | 38 (1.42)                    | 142 (0.55)       |
| Person-years                                 | 5,640                        | 52,939           | 12,938                       | 127,750          |
| Crude incidence rate (per 1000 person-years) | 2.84                         | 1.00             | 2.94                         | 1.11             |
| Follow-up years, median (IQR)                | 3.10 (1.29-6.27)             | 3.08 (1.31-6.07) | 3.51 (1.34-7.17)             | 3.72 (1.51-7.40) |
| Crude HR (95% CI), p-value                   | 2.79 (1.59-4.87);<br>p<0.001 |                  | 2.61 (1.82-3.73);<br>p<0.001 |                  |
| Adjusted HR (95% CI), p-value (Model 2a)     | 3.06 (1.73-5.42);<br>p<0.001 |                  | 2.50 (1.74-3.60);<br>p<0.001 |                  |
| <b>Hypertension</b>                          |                              |                  |                              |                  |
| Population, n                                | 1120                         | 11414            | 2214                         | 22733            |
| Outcome events, n (%)                        | 66 (5.56)                    | 307 (2.62)       | 145 (6.15)                   | 957 (4.04)       |
| Person-years                                 | 4,823                        | 47,418           | 10,397                       | 110,857          |
| Crude incidence rate (per 1000 person-years) | 13.68                        | 6.47             | 13.95                        | 8.63             |
| Follow-up years, median (IQR)                | 3.00 (1.25-5.97)             | 2.95 (1.26-5.77) | 3.19 (1.26-6.37)             | 3.47 (1.43-6.91) |
| Crude HR (95% CI), p-value                   | 2.11 (1.61-2.75);<br>p<0.001 |                  | 1.62 (1.36-1.93);<br>p<0.001 |                  |
| Adjusted HR (95% CI), p-value (Model 2b)     | 1.95 (1.49-2.56);<br>p<0.001 |                  | 1.60 (1.34-1.92);<br>p<0.001 |                  |
| <b>Type 2 diabetes</b>                       |                              |                  |                              |                  |
| Population, n                                | 1255                         | 11796            | 2471                         | 23864            |
| Outcome events, n (%)                        | 34 (2.64)                    | 264 (2.19)       | 120 (4.63)                   | 700 (2.85)       |
| Person-years                                 | 5,499                        | 49,851           | 12,112                       | 119,674          |
| Crude incidence rate (per 1000 person-years) | 6.18                         | 5.30             | 9.91                         | 5.85             |
| Follow-up years, median (IQR)                | 3.11 (1.29-6.24)             | 3.02 (1.28-5.94) | 3.49 (1.34-6.94)             | 3.60 (1.47-7.25) |
| Crude HR (95% CI), p-value                   | 1.16 (0.81-1.66);<br>p=0.407 |                  | 1.70 (1.40-2.07);<br>p<0.001 |                  |
| Adjusted HR (95% CI), p-value (Model 2c)     | 0.82 (0.57-1.18);<br>p=0.279 |                  | 1.35 (1.10-1.64);<br>p=0.003 |                  |

Incidence rates and hazard ratios for cardiometabolic outcomes among women with IIH compared to women without IIH in women with incident IIH diagnosis and in women diagnosed with IIH after the age of 60 years.

Model 2 adjusted for: age, BMI (continuous), Townsend deprivation quintile, smoking status, current (up to 65 days prior to index date) lipid-lowering drug prescription, and a. baseline hypertension and diabetes; b. baseline IHD, HF, stroke/TIA and hypertension; c. baseline IHD, HF, stroke/TIA and diabetes).

IIH: idiopathic intracranial hypertension; CVD: cardiovascular disease; TIA: transient ischaemic attack; HR hazard ratio.
